# Supplementary material for: Biological Determinants of Metabolic Syndrome in Visceral and Subcutaneous Adipose Tissue from Severely Obese Women
Source: MDPI journal article supplement (doi:10.3390/ijms23042394), 2022-02-21
Supplement: s1 [file s1]

# Supplementary Table S1

|                     | MetS- (n=33)    |               |      |                    | MetS+ (n=33)  |               |      |                    | MetS+ vs MetS- |               |      |               |
|---------------------|-----------------|---------------|------|--------------------|---------------|---------------|------|--------------------|----------------|---------------|------|---------------|
|                     | SAT             | VAT           | FC   | P-value            | SAT           | VAT           | FC   | P-value            | SAT            | VAT           | FC   | P-value       |
| <b>Inflammation</b> |                 |               |      |                    |               |               |      |                    |                |               |      |               |
| CD68                | 0.849 ± 0.425   | 0.674 ± 0.175 | 0.79 | 0.118              | 1.246 ± 0.769 | 0.853 ± 0.434 | 0.68 | <b>0.022*</b>      | 1.47           | <b>0.019#</b> | 1.27 | 0.33          |
| CD80                | 0.001 ± 0.001   | 0.001 ± 0.001 | 1.00 | 0.515              | 0.003 ± 0.001 | 0.002 ± 0.001 | 0.67 | 0.071              | 3.00           | <b>0.004#</b> | 2.00 | 0.125         |
| CD14                | 0.423 ± 0.225   | 0.412 ± 0.21  | 0.97 | 0.895              | 0.598 ± 0.288 | 0.506 ± 0.234 | 0.85 | 0.268              | 1.41           | 0.074         | 1.23 | 0.161         |
| MRC1                | 0.113 ± 0.072   | 0.143 ± 0.061 | 1.27 | <b>0.016*</b>      | 0.153 ± 0.087 | 0.159 ± 0.064 | 1.04 | 0.58               | 1.35           | <b>0.03#</b>  | 1.11 | 0.338         |
| MSR1                | 0.156 ± 0.107   | 0.1 ± 0.036   | 0.64 | 0.061              | 0.233 ± 0.152 | 0.128 ± 0.056 | 0.55 | <b>0.009*</b>      | 1.49           | 0.131         | 1.28 | <b>0.045#</b> |
| MCP1                | 0.502 ± 0.49    | 0.953 ± 0.936 | 1.90 | 0.078              | 0.842 ± 1.5   | 0.896 ± 1.033 | 1.06 | 0.178              | 1.68           | 0.805         | 0.94 | 0.583         |
| HIF1A               | 0.23 ± 0.08     | 0.331 ± 0.156 | 1.44 | <b>0.026*</b>      | 0.349 ± 0.196 | 0.312 ± 0.133 | 0.89 | 0.4502             | 1.52           | <b>0.024#</b> | 0.94 | 0.675         |
| IL1B                | 0.019 ± 0.019   | 0.162 ± 0.273 | 8.53 | <b>0.013*</b>      | 0.026 ± 0.039 | 0.185 ± 0.287 | 7.12 | <b>0.011*</b>      | 1.37           | 0.869         | 1.14 | 0.869         |
| IL6                 | 0.293 ± 0.385   | 0.408 ± 0.548 | 1.39 | 0.489              | 0.451 ± 0.889 | 0.301 ± 0.363 | 0.67 | 0.568              | 1.54           | 0.567         | 0.74 | 0.609         |
| TNFA                | 0.0002 ± 0.0002 | 0.001 ± 0.002 | 5.00 | <b>0.008*</b>      | 0.001 ± 0.001 | 0.002 ± 0.005 | 2.00 | <b>0.036*</b>      | 5.00           | 0.353         | 2.00 | 0.625         |
| PAI-1               | 0.074 ± 0.049   | 0.192 ± 0.145 | 2.59 | <b>0.014*</b>      | 0.16 ± 0.16   | 0.207 ± 0.245 | 1.29 | 0.388              | 2.16           | 0.069         | 1.08 | 0.749         |
| <b>Adipokines</b>   |                 |               |      |                    |               |               |      |                    |                |               |      |               |
| ADIPOQ              | 4.35 ± 1.966    | 3.592 ± 1.093 | 0.83 | 0.074              | 5.43 ± 2.802  | 3.359 ± 1.686 | 0.62 | <b>0.001*</b>      | 1.39           | 0.042         | 0.94 | 0.315         |
| LEP                 | 1.217 ± 0.943   | 0.419 ± 0.344 | 0.34 | <b>&lt;0.0001*</b> | 1.165 ± 0.826 | 0.44 ± 0.276  | 0.38 | <b>0.0002*</b>     | 0.96           | 0.986         | 1.05 | 0.481         |
| ADIPOR1             | 0.204 ± 0.075   | 0.196 ± 0.083 | 0.96 | 0.608              | 0.198 ± 0.061 | 0.163 ± 0.044 | 0.82 | <b>0.039*</b>      | 0.97           | 0.783         | 0.83 | 0.267         |
| ADIPOR2             | 0.189 ± 0.08    | 0.181 ± 0.077 | 0.96 | 0.887              | 0.201 ± 0.095 | 0.163 ± 0.072 | 0.81 | 0.149              | 1.06           | 0.55          | 0.90 | 0.466         |
| LEPR                | 0.333 ± 0.175   | 0.27 ± 0.024  | 0.81 | 0.697              | 0.241 ± 0.123 | 0.331 ± 0.094 | 1.37 | <b>0.027*</b>      | 0.62           | 0.009         | 1.23 | 0.436         |
| NPY1R               | 0.112 ± 0.058   | 0.067 ± 0.029 | 0.60 | <b>0.021*</b>      | 0.138 ± 0.074 | 0.066 ± 0.03  | 0.48 | <b>0.002*</b>      | 1.23           | 0.347         | 0.99 | 0.619         |
| <b>Senescence</b>   |                 |               |      |                    |               |               |      |                    |                |               |      |               |
| p16                 | 0.005 ± 0.004   | 0.004 ± 0.004 | 0.80 | 0.335              | 0.006 ± 0.008 | 0.003 ± 0.005 | 0.50 | 0.215              | 1.20           | 0.548         | 0.75 | 0.601         |
| p21                 | 0.058 ± 0.063   | 0.152 ± 0.106 | 2.62 | <b>0.006*</b>      | 0.072 ± 0.068 | 0.139 ± 0.188 | 1.93 | 0.265              | 1.24           | 0.928         | 0.91 | 0.203         |
| P53                 | 0.069 ± 0.031   | 0.055 ± 0.018 | 0.80 | 0.166              | 0.086 ± 0.044 | 0.055 ± 0.017 | 0.64 | <b>0.008*</b>      | 1.25           | 0.24          | 1.00 | 0.885         |
| <b>Autophagy</b>    |                 |               |      |                    |               |               |      |                    |                |               |      |               |
| ATG5                | 0.062 ± 0.012   | 0.057 ± 0.009 | 0.92 | 0.202              | 0.06 ± 0.017  | 0.059 ± 0.014 | 0.98 | 0.884              | 0.97           | 0.829         | 1.04 | 0.416         |
| ATG7                | 0.038 ± 0.011   | 0.046 ± 0.011 | 1.21 | 0.064              | 0.042 ± 0.013 | 0.041 ± 0.01  | 0.98 | 0.85               | 1.11           | 0.437         | 0.89 | 0.144         |
| ATG12               | 0.071 ± 0.019   | 0.067 ± 0.013 | 0.94 | 0.480              | 0.085 ± 0.033 | 0.068 ± 0.015 | 0.80 | 0.129              | 1.20           | 0.231         | 1.01 | 0.931         |
| <b>Adipogenesis</b> |                 |               |      |                    |               |               |      |                    |                |               |      |               |
| PPARG               | 0.514 ± 0.116   | 0.419 ± 0.176 | 0.82 | 0.108              | 0.486 ± 0.175 | 0.341 ± 0.15  | 0.70 | <b>0.021*</b>      | 0.95           | 0.595         | 0.81 | 0.234         |
| PPARA               | 0.038 ± 0.011   | 0.033 ± 0.008 | 0.87 | 0.129              | 0.049 ± 0.011 | 0.034 ± 0.008 | 0.69 | <b>&lt;0.0001*</b> | 1.29           | <b>0.001#</b> | 1.03 | 0.825         |
| FABP4               | 6.089 ± 1.677   | 4.481 ± 1.637 | 0.74 | <b>0.02*</b>       | 7.432 ± 4.142 | 2.392 ± 1.851 | 0.32 | <b>0.002*</b>      | 1.22           | 0.295         | 0.53 | <b>0.003#</b> |
| PDGFRA              | 0.108 ± 0.052   | 0.134 ± 0.044 | 1.24 | <b>0.021*</b>      | 0.115 ± 0.043 | 0.129 ± 0.052 | 1.12 | 0.294              | 1.06           | 0.303         | 0.96 | 0.655         |
| PDGFRB              | 0.281 ± 0.104   | 0.156 ± 0.06  | 0.56 | <b>0.001*</b>      | 0.282 ± 0.109 | 0.148 ± 0.059 | 0.52 | <b>&lt;0.0001*</b> | 1.00           | 0.972         | 0.95 | 0.712         |
| BMP2                | 0.024 ± 0.012   | 0.032 ± 0.016 | 1.33 | 0.123              | 0.022 ± 0.01  | 0.026 ± 0.014 | 1.18 | <b>&gt;0.9999</b>  | 0.92           | 0.685         | 0.81 | 0.316         |
| BMP4                | 0.032 ± 0.018   | 0.038 ± 0.023 | 1.19 | 0.6139             | 0.037 ± 0.016 | 0.04 ± 0.019  | 1.08 | 0.626              | 1.16           | 0.392         | 1.05 | 0.418         |
| <b>Angiogenesis</b> |                 |               |      |                    |               |               |      |                    |                |               |      |               |
| VEGFA               | 0.036 ± 0.015   | 0.051 ± 0.027 | 1.42 | <b>0.016*</b>      | 0.04 ± 0.017  | 0.049 ± 0.021 | 1.23 | 0.103              | 1.21           | 0.115         | 0.96 | 0.826         |
| VEGFB               | 0.259 ± 0.08    | 0.233 ± 0.076 | 0.90 | 0.159              | 0.323 ± 0.14  | 0.254 ± 0.1   | 0.79 | 0.062              | 1.25           | 0.152         | 1.09 | 0.596         |
| VEGFR1              | 0.159 ± 0.057   | 0.179 ± 0.078 | 1.13 | 0.319              | 0.162 ± 0.07  | 0.184 ± 0.107 | 1.14 | 0.839              | 1.02           | 0.88          | 1.03 | 0.826         |
| VEGFR2              | 0.106 ± 0.045   | 0.12 ± 0.045  | 1.13 | 0.593              | 0.105 ± 0.041 | 0.125 ± 0.048 | 1.19 | 0.135              | 0.99           | 0.967         | 1.04 | 0.321         |
| ANGPT1              | 0.031 ± 0.014   | 0.024 ± 0.01  | 0.77 | 0.140              | 0.038 ± 0.024 | 0.028 ± 0.014 | 0.74 | 0.052              | 1.23           | 0.175         | 1.17 | 0.53          |
| ANGPT2              | 0.03 ± 0.016    | 0.023 ± 0.01  | 0.77 | 0.195              | 0.041 ± 0.033 | 0.027 ± 0.015 | 0.66 | <b>0.044*</b>      | 1.37           | 0.22          | 1.17 | 0.749         |

**Supplementary Table S1. Expression analysis of inflammation markers, adipokines and senescence, autophagy, adipogenesis and angiogenesis-related genes.** MetS-, severely obese without MetS; MetS+, severely obese with MetS; SAT, subcutaneous adipose tissue; VAT, visceral adipose tissue. Data expressed as mean ± SD. \* = P<0.05 between depots from the same group. # = P<0.05 respect to the same depot from the other group.

## Supplementary Table S2

|                    | MetS- (n=33)   |                |      |                    | MetS+ (n=33)   |                |      |                    | MetS+ vs MetS- |                          |      |                          |
|--------------------|----------------|----------------|------|--------------------|----------------|----------------|------|--------------------|----------------|--------------------------|------|--------------------------|
|                    | SAT            | VAT            | FC   | P-value            | SAT            | VAT            | FC   | P-value            | SAT            |                          | VAT  |                          |
| Glucose metabolism |                |                |      |                    |                |                |      |                    |                |                          |      |                          |
| GLUT1              | 0.003 ± 0.001  | 0.003 ± 0.001  | 1.00 | 0.49               | 0.003 ± 0.002  | 0.004 ± 0.003  | 1.33 | 0.367              | 1.00           | 0.085                    | 1.33 | <b>0.044<sup>#</sup></b> |
| GLUT4              | 0.05 ± 0.025   | 0.048 ± 0.03   | 0.96 | 0.683              | 0.058 ± 0.024  | 0.045 ± 0.026  | 0.78 | 0.211              | 1.16           | 0.473                    | 0.94 | 0.683                    |
| IRS1               | 0.024 ± 0.013  | 0.013 ± 0.008  | 0.54 | <b>0.005*</b>      | 0.024 ± 0.012  | 0.013 ± 0.008  | 0.54 | <b>0.01*</b>       | 1.00           | 0.9                      | 1.00 | 0.994                    |
| Lipolysis          |                |                |      |                    |                |                |      |                    |                |                          |      |                          |
| KLB                | 0.166 ± 0.108  | 0.708 ± 1.706  | 4.27 | 0.785              | 0.214 ± 0.158  | 1.589 ± 3.976  | 7.43 | 0.3175             | 1.29           | 0.388                    | 2.24 | 0.545                    |
| PLIN1              | 2.527 ± 0.751  | 2.012 ± 0.568  | 0.80 | 0.061              | 2.757 ± 1.299  | 1.768 ± 0.861  | 0.64 | <b>0.045*</b>      | 1.09           | 0.592                    | 0.88 | 0.401                    |
| PLIN2              | 0.593 ± 0.428  | 0.199 ± 0.094  | 0.34 | <b>0.0002*</b>     | 0.439 ± 0.213  | 0.233 ± 0.077  | 0.53 | <b>0.0007*</b>     | 0.74           | 0.563                    | 1.17 | 0.092                    |
| ATGL               | 2.784 ± 0.886  | 2.269 ± 1.137  | 0.82 | 0.055              | 3.297 ± 1.778  | 2.466 ± 1.164  | 0.75 | 0.218              | 1.18           | 0.369                    | 1.09 | 0.615                    |
| HSL                | 0.149 ± 0.188  | 0.076 ± 0.13   | 0.51 | 0.212              | 0.224 ± 0.406  | 0.168 ± 0.172  | 0.75 | 0.943              | 1.50           | 0.676                    | 2.21 | 0.488                    |
| MGLL               | 1.335 ± 0.575  | 0.465 ± 0.131  | 0.35 | <b>0.013*</b>      | 1.584 ± 0.837  | 0.5 ± 0.14     | 0.32 | <b>0.002*</b>      | 1.19           | 0.532                    | 1.08 | 0.587                    |
| Lipogenesis        |                |                |      |                    |                |                |      |                    |                |                          |      |                          |
| SREBF1             | 0.09 ± 0.031   | 0.051 ± 0.015  | 0.57 | <b>&lt;0.0001*</b> | 0.108 ± 0.076  | 0.046 ± 0.04   | 0.43 | <b>0.005*</b>      | 1.20           | 0.989                    | 0.90 | 0.687                    |
| FASN               | 0.521 ± 0.407  | 0.406 ± 0.219  | 0.78 | 0.618              | 0.278 ± 0.184  | 0.26 ± 0.123   | 0.94 | 0.713              | 0.53           | <b>0.012<sup>#</sup></b> | 0.64 | <b>0.009<sup>#</sup></b> |
| MOGAT1             | 0.002 ± 0.001  | 0.001 ± 0.001  | 0.50 | 0.12               | 0.003 ± 0.002  | 0.002 ± 0.001  | 0.67 | 0.069              | 1.50           | <b>0.028<sup>#</sup></b> | 2.00 | 0.313                    |
| DGAT2              | 0.757 ± 0.372  | 0.306 ± 0.235  | 0.40 | <b>&lt;0.0001*</b> | 0.872 ± 0.403  | 0.386 ± 0.314  | 0.44 | <b>0.0008*</b>     | 1.15           | 0.475                    | 1.26 | 0.276                    |
| LPL                | 2.884 ± 1.201  | 2.27 ± 1.147   | 0.79 | 0.095              | 3.14 ± 1.515   | 2.251 ± 1.039  | 0.72 | <b>0.036*</b>      | 1.09           | 0.527                    | 0.99 | 0.873                    |
| ABCA1              | 0.223 ± 0.065  | 0.172 ± 0.046  | 0.77 | <b>0.03*</b>       | 0.263 ± 0.104  | 0.158 ± 0.084  | 0.60 | <b>0.005*</b>      | 1.18           | 0.27                     | 0.92 | 0.186                    |
| APOE               | 0.014 ± 0.008  | 0.003 ± 0.002  | 0.21 | <b>&lt;0.0001*</b> | 0.011 ± 0.007  | 0.003 ± 0.002  | 0.27 | <b>&lt;0.0001*</b> | 0.79           | 0.145                    | 1.00 | 0.453                    |
| Beiging / FAO      |                |                |      |                    |                |                |      |                    |                |                          |      |                          |
| UCP1               | 0.001 ± 0.002  | 0.005 ± 0.005  | 5.00 | <b>0.0005*</b>     | 0.001 ± 0.001  | 0.002 ± 0.002  | 2.00 | 0.055              | 1.00           | 0.603                    | 0.40 | <b>0.017<sup>#</sup></b> |
| UCP2               | 0.654 ± 0.102  | 0.4 ± 0.152    | 0.61 | 0.451              | 0.607 ± 0.334  | 0.437 ± 0.179  | 0.72 | 0.095              | 0.93           | 0.18                     | 1.09 | 0.614                    |
| UCP3               | 0.001 ± 0.001  | 0.001 ± 0.0004 | 1.00 | 0.118              | 0.002 ± 0.001  | 0.001 ± 0.0004 | 0.50 | 0.054              | 2.00           | 0.323                    | 1.00 | 0.964                    |
| DIO2               | 0.008 ± 0.003  | 0.003 ± 0.002  | 0.38 | <b>0.002*</b>      | 0.009 ± 0.006  | 0.003 ± 0.001  | 0.33 | <b>0.044*</b>      | 1.13           | 0.642                    | 1.00 | 0.776                    |
| PGC1A              | 0.006 ± 0.003  | 0.008 ± 0.003  | 1.33 | <b>0.002*</b>      | 0.005 ± 0.003  | 0.007 ± 0.003  | 1.40 | <b>0.036*</b>      | 0.83           | 0.515                    | 0.88 | 0.426                    |
| ADRB1              | 0.011 ± 0.005  | 0.025 ± 0.014  | 2.27 | <b>0.0001*</b>     | 0.019 ± 0.009  | 0.028 ± 0.013  | 1.47 | 0.058              | 1.73           | <b>0.028<sup>#</sup></b> | 1.12 | 0.477                    |
| ADRB3              | 0.001 ± 0.001  | 0.003 ± 0.003  | 3.00 | 0.146              | 0.001 ± 0.001  | 0.001 ± 0.0008 | 1.00 | 0.151              | 1.00           | 0.842                    | 0.33 | <b>0.004<sup>#</sup></b> |
| PRDM16             | 0.001 ± 0.0005 | 0.003 ± 0.0008 | 3.00 | <b>0.009*</b>      | 0.002 ± 0.0006 | 0.003 ± 0.001  | 1.50 | <b>0.005*</b>      | 2.00           | <b>0.031<sup>#</sup></b> | 1.00 | 0.434                    |
| PGC1B              | 0.005 ± 0.002  | 0.009 ± 0.002  | 1.80 | <b>0.002*</b>      | 0.006 ± 0.002  | 0.008 ± 0.003  | 1.33 | 0.09               | 1.20           | 0.347                    | 0.89 | 0.813                    |
| CIDEA              | 0.015 ± 0.005  | 0.034 ± 0.009  | 2.27 | <b>0.0007*</b>     | 0.017 ± 0.008  | 0.022 ± 0.008  | 1.29 | 0.169              | 1.13           | 0.406                    | 0.65 | <b>0.002<sup>#</sup></b> |
| CPT1A              | 0.046 ± 0.012  | 0.034 ± 0.008  | 0.74 | <b>0.016*</b>      | 0.062 ± 0.014  | 0.021 ± 0.007  | 0.34 | <b>&lt;0.0001*</b> | 1.37           | <b>0.006<sup>#</sup></b> | 1.41 | <b>0.003<sup>#</sup></b> |
| ACOX1              | 0.297 ± 0.118  | 0.178 ± 0.11   | 0.60 | <b>0.005*</b>      | 0.268 ± 0.118  | 0.216 ± 0.092  | 0.81 | 0.195              | 0.90           | 0.547                    | 1.21 | 0.081                    |

**Supplementary Table S2. Expression analysis of genes involved in glucose and lipid metabolism, fatty acid oxidation and beiging.** MetS-, severely obese without MetS; MetS+, severely obese with MetS; SAT, subcutaneous adipose tissue; VAT, visceral adipose tissue; FAO, fatty acid oxidation. Data expressed as mean ± SD. \*= P<0.05 between depots from the same group. <sup>#</sup>= P<0.05 respect to the same depot from the other group.

# Supplementary Table S3

|                | MetS- (n=33)    |               |        |          | MetS+ (n=33)    |                 |        |          | MetS+ vs MetS- |                    |      |                      |
|----------------|-----------------|---------------|--------|----------|-----------------|-----------------|--------|----------|----------------|--------------------|------|----------------------|
|                | SAT             | VAT           | FC     | P-value  | SAT             | VAT             | FC     | P-value  | SAT            |                    | VAT  |                      |
| ECM remodeling |                 |               |        |          |                 |                 |        |          |                |                    |      |                      |
|                | FC              | P-value       | FC     | P-value  | FC              | P-value         | FC     | P-value  | FC             | P-value            | FC   | P-value              |
| TCF21          | 0.0004 ± 0.0002 | 0.011 ± 0.004 | 27.50  | <0.0001* | 0.0004 ± 0.0003 | 0.011 ± 0.001   | 27.50  | <0.0001* | 1.00           | >0.9999            | 1.00 | 0.978                |
| TGFB1          | 0.134 ± 0.055   | 0.098 ± 0.03  | 0.73   | 0.003*   | 0.18 ± 0.099    | 0.129 ± 0.051   | 0.72   | 0.04*    | 1.34           | 0.033 <sup>#</sup> | 1.32 | 0.01 <sup>#</sup>    |
| F13A1          | 0.335 ± 0.196   | 0.287 ± 0.135 | 0.86   | 0.506    | 0.572 ± 0.392   | 0.461 ± 0.296   | 0.81   | 0.427    | 1.71           | 0.026 <sup>#</sup> | 1.61 | 0.028 <sup>#</sup>   |
| COL1A1         | 0.512 ± 0.445   | 2.562 ± 3.102 | 5.00   | 0.014*   | 0.516 ± 0.313   | 4.927 ± 7.962   | 9.55   | 0.041*   | 1.01           | 0.717              | 1.92 | 0.920                |
| COL3A1         | 0.168 ± 0.11    | 0.474 ± 0.237 | 2.82   | 0.0004*  | 0.269 ± 0.243   | 0.403 ± 0.135   | 1.50   | 0.039*   | 1.60           | 0.266              | 0.85 | 0.393                |
| COL4A1         | 1.711 ± 0.699   | 4.596 ± 7.885 | 2.69   | >0.9999  | 2.275 ± 1.188   | 8.014 ± 14.524  | 3.52   | 0.373    | 1.33           | 0.172              | 1.74 | 0.758                |
| COL5A1         | 0.177 ± 0.053   | 0.326 ± 0.146 | 1.84   | 0.0087*  | 0.241 ± 0.123   | 0.222 ± 0.050   | 0.92   | 0.656    | 1.36           | 0.168              | 0.68 | 0.036 <sup>#</sup>   |
| COL6A1         | 0.02 ± 0.016    | 0.022 ± 0.034 | 1.10   | 0.156    | 0.044 ± 0.066   | 0.048 ± 0.07    | 1.09   | 0.334    | 2.20           | 0.228              | 2.18 | 0.265                |
| COL6A3         | 0.353 ± 0.148   | 0.182 ± 0.135 | 0.52   | <0.0001* | 0.411 ± 0.188   | 0.189 ± 0.076   | 0.46   | <0.0001* | 1.16           | 0.386              | 1.04 | 0.373                |
| MMP2           | 0.685 ± 0.238   | 1.495 ± 0.889 | 2.18   | 0.015*   | 0.744 ± 0.474   | 0.766 ± 0.288   | 1.03   | 0.641    | 1.09           | 0.74               | 0.51 | 0.016 <sup>#</sup>   |
| MMP9           | 0.211 ± 0.217   | 0.039 ± 0.034 | 0.18   | <0.0001* | 0.288 ± 0.325   | 0.038 ± 0.025   | 0.13   | <0.0001* | 1.36           | 0.387              | 0.97 | 0.712                |
| MMP13          | 0.002 ± 0.002   | 0.001 ± 0.001 | 0.50   | 0.887    | 0.002 ± 0.003   | 0.0001 ± 0.0002 | 0.05   | 0.0006*  | 1.00           | 0.882              | 0.10 | 0.0005 <sup>#</sup>  |
| MMP14          | 0.161 ± 0.076   | 0.431 ± 0.165 | 2.68   | <0.0001* | 0.198 ± 0.11    | 0.401 ± 0.113   | 2.03   | 0.0004*  | 1.23           | 0.401              | 0.93 | 0.804                |
| MMP15          | 0.021 ± 0.01    | 0.045 ± 0.054 | 2.14   | 0.773    | 0.029 ± 0.022   | 0.026 ± 0.017   | 0.90   | 0.945    | 1.38           | 0.402              | 0.58 | 0.954                |
| TIMP1          | 0.091 ± 0.037   | 1.330 ± 0.654 | 14.62  | <0.0001* | 0.155 ± 0.157   | 0.603 ± 0.268   | 3.89   | 0.0002*  | 1.70           | 0.331              | 0.45 | 0.002 <sup>#</sup>   |
| TIMP2          | 0.481 ± 0.224   | 0.359 ± 0.059 | 0.75   | 0.03*    | 0.66 ± 0.523    | 0.343 ± 0.049   | 0.52   | 0.175    | 1.37           | 0.521              | 0.96 | 0.652                |
| TIMP3          | 0.824 ± 0.39    | 3.247 ± 1.769 | 3.94   | 0.0007*  | 0.979 ± 0.67    | 2.731 ± 1.464   | 2.79   | 0.0008*  | 1.19           | 0.882              | 0.84 | 0.761                |
| HYAL1          | 0.023 ± 0.029   | 0.221 ± 0.141 | 9.61   | <0.0001* | 0.023 ± 0.014   | 0.066 ± 0.029   | 2.87   | <0.0001* | 1.00           | 0.185              | 0.30 | <0.0001 <sup>#</sup> |
| HYAL2          | 0.247 ± 0.093   | 1.774 ± 1.095 | 7.18   | <0.0001* | 0.335 ± 0.269   | 0.506 ± 0.297   | 1.51   | 0.0648   | 1.36           | 0.603              | 0.29 | 0.001 <sup>#</sup>   |
| LOX            | 0.206 ± 0.091   | 0.625 ± 0.349 | 3.03   | 0.002*   | 0.254 ± 0.159   | 0.441 ± 0.117   | 1.74   | 0.005*   | 1.23           | 0.44               | 0.71 | 0.111                |
| BGN            | 0.287 ± 0.151   | 0.192 ± 0.069 | 0.67   | 0.005*   | 0.392 ± 0.408   | 0.185 ± 0.036   | 0.47   | 0.003*   | 1.37           | 0.387              | 0.96 | 0.776                |
| LOXL2          | 0.12 ± 0.057    | 0.052 ± 0.027 | 0.43   | <0.0001* | 0.177 ± 0.106   | 0.053 ± 0.019   | 0.30   | <0.0001* | 1.48           | 0.025 <sup>#</sup> | 1.02 | 0.91                 |
| LOXL4          | 0.009 ± 0.004   | 0.008 ± 0.009 | 0.89   | 0.028*   | 0.013 ± 0.01    | 0.022 ± 0.031   | 1.69   | 0.396    | 1.44           | 0.044 <sup>#</sup> | 2.75 | 0.194                |
| HAS1           | 0.006 ± 0.008   | 0.813 ± 1.343 | 135.50 | <0.0001* | 0.009 ± 0.008   | 2.316 ± 6.443   | 257.33 | <0.0001* | 1.50           | 0.056              | 2.85 | 0.928                |
| HAS2           | 0.01 ± 0.004    | 0.016 ± 0.017 | 1.60   | 0.702    | 0.02 ± 0.019    | 0.01 ± 0.005    | 0.50   | 0.287    | 2.00           | 0.503              | 0.63 | 0.629                |
| CD44           | 0.007 ± 0.004   | 0.003 ± 0.002 | 0.43   | 0.001*   | 0.011 ± 0.01    | 0.004 ± 0.006   | 0.36   | 0.004*   | 1.57           | 0.656              | 1.33 | 0.525                |
| ELN            | 0.203 ± 0.08    | 0.297 ± 0.171 | 1.46   | 0.097    | 0.327 ± 0.286   | 0.221 ± 0.086   | 0.68   | 0.56     | 1.61           | 0.403              | 0.74 | 0.196                |
| FN1            | 0.49 ± 0.255    | 0.365 ± 0.329 | 0.74   | 0.094    | 0.749 ± 0.938   | 0.43 ± 0.336    | 0.57   | 0.442    | 1.53           | 0.882              | 1.18 | 0.460                |

**Supplementary Table S3. Expression analysis of genes involved in ECM composition and remodeling.** MetS-, severely obese without MetS; MetS+, severely obese with MetS; SAT, subcutaneous adipose tissue; VAT, visceral adipose tissue; ECM, extracellular matrix. Data expressed as mean ± SD. \*= P<0.05 between depots from the same group. #= P<0.05 respect to the same depot from the other group.

Supplementary Table S4

| GENE       | SEQUENCE | (5'-3')                     |
|------------|----------|-----------------------------|
| ABCA1      | F        | GGAGGCCAGAATGACATCTTAG      |
| ABCA1      | R        | TTTCCAGCCCCATTAAGTCC        |
| ACOX1      | F        | ACCATTGCCATCCGATACAG        |
| ACOX1      | R        | GGTCTCCTTCATGTATGCGC        |
| ADFP/PLIN2 | F        | AGTATCCCTACCTGAAGTCTGTG     |
| ADFP/PLIN2 | R        | CCCCTTACAGGCATAGGTATTG      |
| ADIPOQ     | F        | ACAATGACTCCACCTTCACAG       |
| ADIPOQ     | R        | TTCTTAACCGTACTGAAAGCC       |
| ADRB1      | F        | CCGGGAACAGGAACACAC          |
| ADRB1      | R        | GAAAGCAAAAGGAAATATGCTTGA    |
| ADRB3      | F        | TTTTCTAATCCCCAGCCTTG        |
| ADRB3      | R        | CACGGCAGCTGGACACTAC         |
| ANGPT1     | F        | TTAAAGGACTTACAGGGACAGC      |
| ANGPT1     | R        | GACCACATGCATCAAACAC         |
| ANGPT2     | F        | CCACGAGACTTGAATTCAGC        |
| ANGPT2     | R        | TGTGCTTGCTCTCCATAGCTAG      |
| APOE       | F        | CAGCGACAATCACTGAACG         |
| APOE       | R        | GTGAATCTTTAATTAAGTAGGCTCCAC |
| ATG12      | F        | AATCAGTCCCTTGCTCCTTCC       |
| ATG12      | R        | GCAAGTTGATTTCTTTGTGGTTT     |
| ATG5       | F        | AGCAACTCTGGATGGGATTG        |
| ATG5       | R        | AGGTCTTTCTAGCTGTTGCTG       |
| ATG7       | F        | TTTTGCTATCCTGCCCTCTG        |
| ATG7       | R        | GCTGTGACTCCTTCTGTTTGAC      |
| ATGL       | F        | CACTTCAACTCCAAGGACGAG       |
| ATGL       | R        | CTCATAGAGTGGCAGGTTGTC       |
| BMP2       | F        | CTATCAGGACATGGTTGTGGAG      |
| BMP2       | R        | GGGAAATATTAAAGTGCTCAACTGGG  |
| BMP4       | F        | TGGCTGTCAAGATCATGGAC        |
| BMP4       | R        | CCCGTCTCAGGTATCAAACATAG     |
| CD14       | F        | CAGAGGTTTCGGAAGACTTATCG     |
| CD14       | R        | TTCGGAGAAGTTGCAGACG         |
| CD206/MRC1 | F        | GCAAAGTGATTACGTGTCTTG       |
| CD206/MRC1 | R        | CTGTTATGTGCGTGGCAAATG       |
| CD68       | F        | ATGGCGGTGGAGTACAATG         |
| CD68       | R        | TGGACAGCTGGTGAAGAATG        |
| CD80       | F        | CCATCCAAGTGTCCATACCTC       |
| CD80       | F        | CTCACTTCTGTTCAAGTGTTATCCA   |
| CD80       | R        | GCCAGCTCTTCAACAGAAATG       |
| CD80       | R        | TCCTTTTGCCAGTAGATGCGA       |
| CD86       | F        | ACATTCTCTTTGTGATGGCCCTTC    |
| CD86       | R        | TGCAGTCTCATTGAAATAAGCTTGA   |
| CIDEA      | F        | GGCAGGTTACAGTGTGGATA        |
| CIDEA      | R        | GAAACACAGTGTTTGGCTCAAGA     |
| CPT1A      | F        | TCCAGTTGGCTTATCGTGGTG       |
| CPT1A      | R        | CTAACGAGGGGTGCATCTTGG       |
| DGAT2      | F        | TCCGAATGCCTGTGTTGAG         |
| DGAT2      | R        | CAAAATAGTCTATGGTGTCCCGG     |
| FABP4      | F        | CATGTGCAGAAATGGGATGG        |
| FABP4      | R        | AACTTCAGTCCAGGTCAACG        |
| FASN       | F        | CAGAGTCGGAGAACCTTGACAG      |
| FASN       | R        | GGAGGCATCAAACCTAGACAG       |
| HIF1A      | F        | AAGAACTTTTAGGCCGCTCA        |
| HIF1A      | R        | CAACCCAGACATATCCACCTC       |
| HSL/LIPE   | F        | TCATCTCCATCGACTACTCCC       |
| HSL/LIPE   | R        | AGATTCTGTTCCCCTGTTGAG       |
| IL6        | F        | CAACCTGAACCTTCCAAGATG       |
| IL6        | R        | ACCTCAAACCTCAAAAAGACCAG     |
| IRS1       | F        | TCTGCTCAGCGTTGGTG           |
| IRS1       | R        | GTGCATGCTCTTGGGTTTG         |
| KLB        | F        | CATGGGTATGGGACAGGTATG       |
| KLB        | R        | TCTGATGTGGGCGGAAATG         |
| LEP        | F        | GCTTCAGGCTACTCCACAG         |
| LEP        | R        | CCTTCCCTTAACGTAGTCCTTG      |
| LEPR       | F        | TCAACCAAGTACAATCCAGTCAC     |
| LEPR       | R        | TTTGGGCTCAGATATGGGATG       |
| LPL        | F        | GGACTGAGAGTGAACCCATAC       |
| LPL        | R        | GGAAGGAGTAGGTCTTATTTGTGG    |
| MCP1/CCL2  | F        | CCTCCAGCATGAAAGTCTCTG       |
| MCP1/CCL2  | R        | TCTGCACTGAGATCTTCTATTG      |

| GENE           | SEQUENCE | (5'-3')                     |
|----------------|----------|-----------------------------|
| MGLL           | F        | AGCATGCCAGAGGAAAGTTC        |
| MGLL           | R        | ATGGGACAGAAAGATGAGGG        |
| MOGAT1         | F        | GAAAGCCATCCACACTGTTG        |
| MOGAT1         | R        | GCCATACCTTCTCTTTGTGTTCC     |
| MSR1           | F        | ATCTGTGAAATTTGATGCTCGC      |
| MSR1           | R        | CCAATGAGAGGGATGAGAACTG      |
| P16/CDKN2A     | F        | GATGTCGCACGGTACCTG          |
| P16/CDKN2A     | R        | TCCTCTGGTTCTTTCAATCGGG      |
| P21/CDKN1A     | F        | GAACCTCGACTTTGTCAACCGAGAC   |
| P21/CDKN1A     | R        | TGGAGTGGTAGAAATCTGTCATGCT   |
| P53/TP53       | F        | CAGCACATGACGGAGGTTGT        |
| P53/TP53       | R        | TCATCCAAATACTCCACACGC       |
| PAI-1/SERPINE1 | F        | GTGGACTTTTCAGAGGTGGAG       |
| PAI-1/SERPINE1 | R        | GAAGTAGAGGGGATCCACAG        |
| PDGFRA         | F        | TTCTCTGCCTGACATTGAC         |
| PDGFRA         | R        | GTCTTCAATGGTCTCGTCCCTC      |
| PDGFRB         | F        | ATGTGACGGGAGAGTGTGAATG      |
| PDGFRB         | R        | CGAGCTACGAAATTTGATGTG       |
| PGC1B          | F        | GTACATTCAAAATCTCTCCAGCGACAT |
| PGC1B          | R        | GAGGGCTCGTTGCGCTTCTCAGGGC   |
| PLIN1          | F        | CATTGAGAAGGTGGTGGAGTAC      |
| PLIN1          | R        | GTGATTCAGAGGAGGAGTGTG       |
| PLIN2          | F        | AGTATCCCTACCTGAAGTCTGTG     |
| PLIN2          | R        | CCCCTTACAGGCATAGGTATTG      |
| PPARA          | F        | CTATCATTTGCTGTGGAGATCG      |
| PPARA          | R        | AAGATATCGTCCGGGTGGTT        |
| PPARG          | F        | GTCGGTTTCAGAAATGCCTTG       |
| PPARG          | R        | GCTGGTCGATATCACTGGAG        |
| PPARGC1A/PGC1A | F        | CAGGCAGTAGATCCTCTTCAAG      |
| PPARGC1A/PGC1A | R        | TCCTCGATGTGCTCAACTCTG       |
| PRDM16         | F        | CACGAGTGCAAGGACTGC          |
| PRDM16         | R        | TGTGGATGACCATGTGCTG         |
| RPL6           | F        | CCTTAATTCTCTTTCCCATCTTGC    |
| RPL6           | R        | TTCTTGGCTTCGGGTTTCTT        |
| SDHA           | F        | TGGTTGCTTTTGGTCGGG          |
| SDHA           | R        | GCGTTTGGTTTAATTGGAGGG       |
| SLC2A1/GLUT1   | F        | TCATCGTGGCTGAACCTCTTC       |
| SLC2A1/GLUT1   | R        | GATGAAGACGTAGGGACCAC        |
| SLC2A4/GLUT4   | F        | ACTGGACGAGCAACTTCATC        |
| SLC2A4/GLUT4   | R        | GAGGACCCGCAAAATAGAAGGAA     |
| SOD2           | F        | GACAAACCTCAGCCCTAACG        |
| SOD2           | R        | GAAACCAAGCCAACCCCAAC        |
| SREBF1         | F        | TTCTGACAGCCATGAAGACAG       |
| SREBF1         | R        | CCGCATCTACGACCAGTG          |
| TGFB1          | F        | TTGATGTCAACCGGAGTTGTG       |
| TGFB1          | R        | GTAGTGAACCCGTTGATGTC        |
| TNFA           | F        | AGGTCTACTTTGGGATCATTGC      |
| TNFA           | R        | GAAGAGGTTGAGGGTGTCTG        |
| UCP1           | F        | GGACTACTCCCAATCTGATGAG      |
| UCP1           | R        | AAATCCAGCGATAAGAGCCG        |
| UCP2           | F        | TCCTGAAAGCCAACCTCATG        |
| UCP2           | R        | GGCAGAGTTATCATGTCTCTGTC     |
| UCP3           | F        | AGAAATATACGCGGGACTATGG      |
| UCP3           | R        | CTTGAGGATGTCGTAGGTAC        |
| VEGFA          | F        | AGTCCAACATCACCATGCAG        |
| VEGFA          | R        | TTCCCTTTCTCTGAACTGATTT      |
| VEGFB          | F        | CTTAGAGCTCAACCCAGACAC       |
| VEGFB          | R        | ACCCTGCTGAGTCTGAAAAG        |
| VEGFR1         | F        | TCCCTCAACCTACAATCAAGTG      |
| VEGFR1         | R        | GCTCTCAATTCTGTTTCCCATG      |
| VEGFR2         | F        | CATTTCAAAGGAGAAGCAGAGC      |
| VEGFR2         | R        | GAGGAATGGCATAGACCGTAC       |

Supplementary Table S4. List of oligonucleotides. F, forward; R, reverse.

Supplementary Figure S1

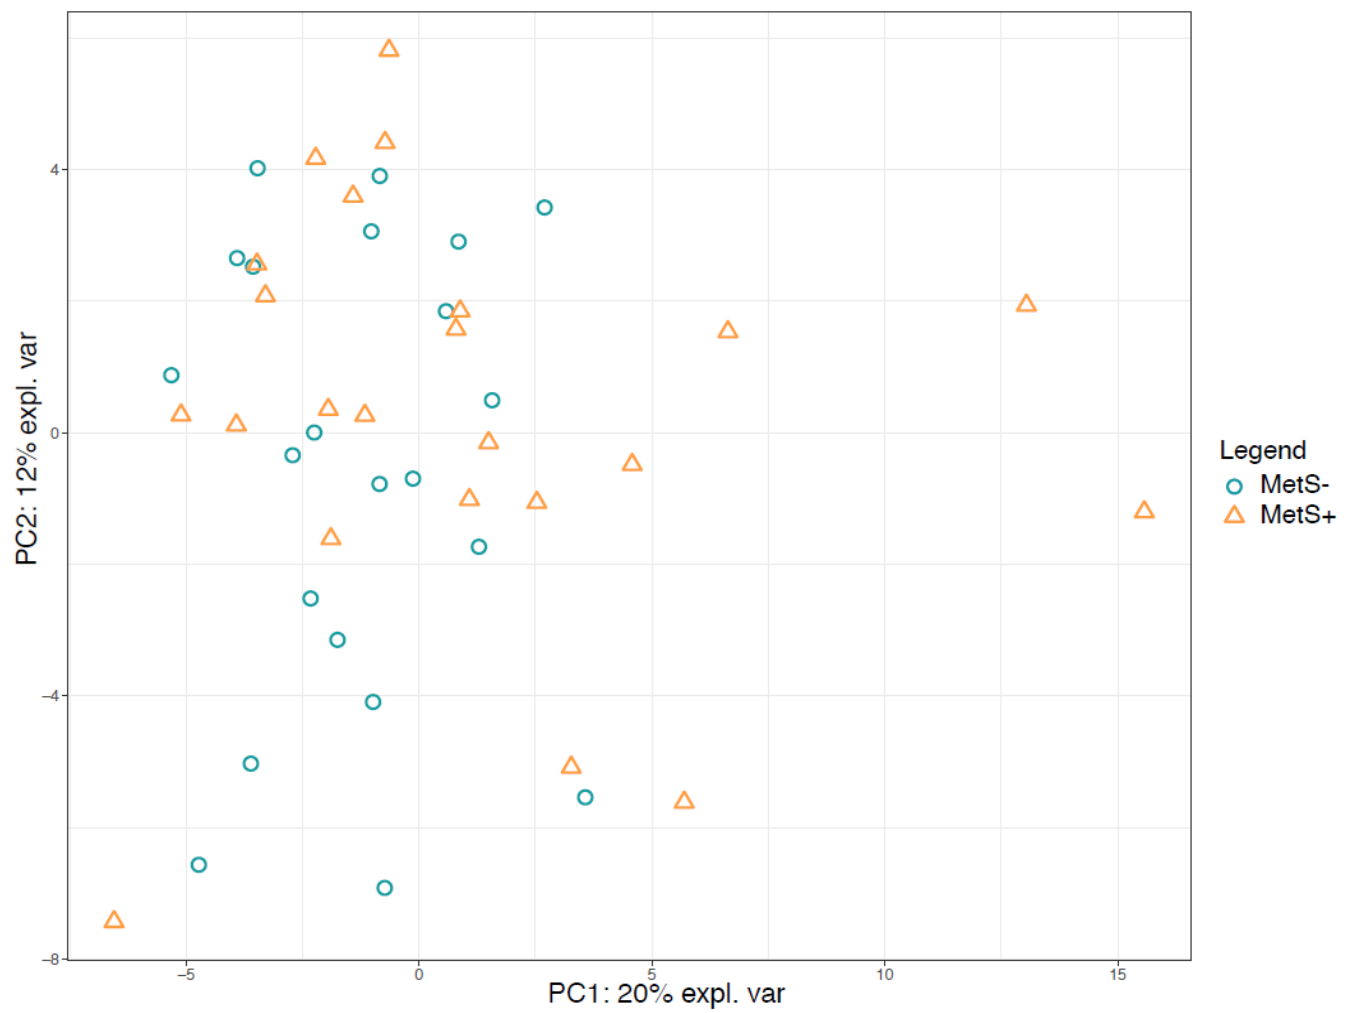

Supplementary Figure S1. Unsupervised PCA including expression data from all 93 genes.
